# Supplementary material for: The staggered retreat of grounded ice in the Ross Sea, Antarctica, since the Last Glacial Maximum (LGM)
Source: Copernicus journal article supplement (doi:10.5194/tc-18-1125-2024), 2024-03-08
Supplement: Supplementary file 1 [file tc-18-1125-2024-supplement.pdf]

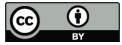

*Supplement of*

## **The staggered retreat of grounded ice in the Ross Sea, Antarctica, since the Last Glacial Maximum (LGM)**

**Matthew A. Danielson and Philip J. Bart**

*Correspondence to:* Matthew A. Danielson (mdani38@lsu.edu)

The copyright of individual parts of the supplement might differ from the article licence.

**Table S1: Seismic surveys used in study**

| Survey   | Type | Source                            | Fold     | Processing                                                                                                     | Number of Lines | Year | Length (km)                   |
|----------|------|-----------------------------------|----------|----------------------------------------------------------------------------------------------------------------|-----------------|------|-------------------------------|
| ATC82B   | MCS  | 35.54 L Bolt-type airgun array    | 48       | Conventional 24-fold, full-trace AGC, vertical stack 2:1                                                       | 7               | 1982 | 1790                          |
| BG80     | MCS  | 23.45 L Tuned "U" 24 airgun array | 24       | Predictive deconvolution, 24-fold stack, adaptive deconvolution, full-trace AGC                                | 26              | 1980 | 6742                          |
| IT88     | MCS  | 45.16 L airgun array              | 24       | FK filtering, deconvolution before stack, deconvolution after stack                                            | 6               | 1988 | 2324                          |
| IT89RS   | MCS  | 45.16 L airgun array              | 30       | Reformat, trace sum, resample, amplitude recovery gather, deconvolution, NMO, mute, stack, decimation, balance | 24              | 1989 | 4131                          |
| IT90RS   | MCS  | 22.5 L airgun array               | 60       | Reformat, trace sum, resample, amplitude recovery gather, deconvolution, NMO, mute, stack, decimation, balance | 31              | 1990 | 640                           |
| IT94     | MCS  | 71.5 L airgun array               | 30/<br>3 | Reformat, trace sum, resample, amplitude recovery gather, deconvolution, NMO, mute, stack, decimation, balance | 5               | 1994 | 852 (30 fold)<br>673 (3 fold) |
| L284AN   | MCS  | 21.5 L airgun array               | 24       | Demultiplex, gain recovery, velocity analysis, normal moveout, filter and post-stack gain, display             | 19              | 1984 | 2405                          |
| NBP9601  | MCS  |                                   |          |                                                                                                                | 50              | 1996 | 1206                          |
| NBP0301  | MCS  |                                   |          |                                                                                                                | 40              | 2003 | 2093                          |
| NBP0301A | SCS  |                                   |          |                                                                                                                | 46              | 2003 | 1480                          |
| NBP0306  | MCS  |                                   |          |                                                                                                                | 41              | 2003 | 1217                          |
| NBP0401  | MCS  |                                   |          |                                                                                                                | 65              | 2004 | 2839                          |
| NBP0701  | MCS  |                                   |          |                                                                                                                | 25              | 2007 | 2657                          |

|         |                        |                                      |           |                                                                                                                                                                                                                                                                                                                                             |    |      |      |
|---------|------------------------|--------------------------------------|-----------|---------------------------------------------------------------------------------------------------------------------------------------------------------------------------------------------------------------------------------------------------------------------------------------------------------------------------------------------|----|------|------|
| NBP0802 | SCS                    |                                      |           |                                                                                                                                                                                                                                                                                                                                             | 7  | 2008 | 525  |
| NBP1502 | MCS                    |                                      |           |                                                                                                                                                                                                                                                                                                                                             | 4  | 2015 | 2109 |
| PD90    | SCS                    |                                      |           |                                                                                                                                                                                                                                                                                                                                             | 53 | 1990 | 5545 |
| SEV87   | MCS                    | 10.0 L bolt-type airgun              | 24        | Conventional 24-Fold, vertical stack 2:1, full-trace AGC                                                                                                                                                                                                                                                                                    | 15 | 1987 | 4439 |
| SEV89   | MCS                    | 7.5 L bolt-type airgun               | 48        | Conventional 24-Fold, vertical stack 2:1, full-trace AGC                                                                                                                                                                                                                                                                                    | 11 | 1989 | 3160 |
| TH82    | MCS                    | 9.2 L bolt-type airgun               | 6         | Conventional 6-Fold, full-trace AGC, vertical stack 4:1                                                                                                                                                                                                                                                                                     | 8  | 1982 | 1495 |
| TH91    | MCS                    | 13.11 L water gun array              | 6         | Demultiplex, processing sample interval, time zero adjustment, band pass filter, noise trace edit, CDP sort, spherical divergence compensation, AGC, deconvolution, velocity analysis, normal moveout, CDP stack, post stack deconvolution, time variant band pass filter, datum correction, trace balance, two trace mixing, trace scaling | 11 | 1991 | 2720 |
| TH92    | MCS                    | 7.37 L GI gun array                  | 12/<br>24 | Demultiplex, processing sample interval, time zero adjustment, band pass filter, noise trace edit, CDP sort, spherical divergence compensation, AGC, deconvolution, velocity analysis, normal moveout, CDP stack, post stack deconvolution, time variant band pass filter, datum correction, trace balance, two trace mixing, trace scaling | 8  | 1992 | 2143 |
| TH95    | MCS                    | 9.83 —<br>13.76 L<br>GI gun<br>array | 48        | Demultiplex, two traces summation, band pass filter, noise trace edit, CDP sort, spherical divergence compensation, AGC, deconvolution, velocity analysis, normal moveout, CDP stack, post stack deconvolution, time variant band pass filter, datum correction, trace balance, two trace vertical stack, trace scaling                     | 8  | 1995 | 1206 |
| NBP9307 | SCS<br>(Paper<br>only) |                                      |           |                                                                                                                                                                                                                                                                                                                                             |    | 1993 | 4713 |

|         |                        |                                  |  |  |  |      |      |
|---------|------------------------|----------------------------------|--|--|--|------|------|
| NBP9401 | SCS<br>(Paper<br>only) | 50 in <sup>3</sup> GI<br>air gun |  |  |  | 1994 | 4100 |
| NBP9501 | SCS<br>(Paper<br>only) | 50 in <sup>3</sup> GI<br>air gun |  |  |  | 1995 | 3041 |
| NBP9902 | SCS<br>(Paper<br>only) |                                  |  |  |  | 1999 | 935  |

**Table S2: Seismic refraction solutions for sonobuoy measurements. Modified from Cochran et al., 1992**

| Sonobuoy No | Expedition       | Latitude | Longitude | Water Depth (m) | Layer 1 Thickness (m) | Layer 1 Velocity (m/s) |
|-------------|------------------|----------|-----------|-----------------|-----------------------|------------------------|
| 2           | S.P. Lee<br>1984 | -77.19   | 163.93    | 271             | 500                   | 2090                   |
| 6           | S.P. Lee<br>1984 | -77.03   | 165.85    | 860             | 180                   | 1860                   |
| 7           | S.P. Lee<br>1984 | -77.27   | 163.89    | 945             | 650                   | 1920                   |
| 9           | S.P. Lee<br>1984 | -76.65   | 167.72    | 827             | 30                    | 1920                   |
| 10          | S.P. Lee<br>1984 | -76.31   | 164.93    | 850             | 810                   | 1900                   |
| 11          | S.P. Lee<br>1984 | -75.95   | 163.17    | 728             | 120                   | 2970                   |
| 12          | S.P. Lee<br>1984 | -75.96   | 164.82    | 898             | 900                   | 1930                   |
| 13          | S.P. Lee<br>1984 | -76.01   | 166.77    | 690             | 190                   | 1920                   |
| 14          | S.P. Lee<br>1984 | -76.02   | 169.24    | 569             | 120                   | 1930                   |
| 15          | S.P. Lee<br>1984 | -75.77   | 169.03    | 486             | 90                    | 1910                   |
| 17          | S.P. Lee<br>1984 | -75.16   | 165.91    | 856             | 150                   | 1950                   |
| 18          | S.P. Lee<br>1984 | -75.00   | 167.51    | 525             | 160                   | 1900                   |
| 19          | S.P. Lee<br>1984 | -75.02   | 170.94    | 541             | 20                    | 1930                   |
| 20          | S.P. Lee<br>1984 | -74.83   | 172.34    | 592             | 30                    | 2190                   |
| 21          | S.P. Lee<br>1984 | -74.49   | 170.15    | 465             | 320                   | 1940                   |
| 22          | S.P. Lee<br>1984 | -74.13   | 168.75    | 629             | 200                   | 2280                   |
| 23          | S.P. Lee<br>1984 | -74.05   | 171.25    | 569             | 340                   | 1930                   |



|    |                        |        |         |      |     |      |
|----|------------------------|--------|---------|------|-----|------|
| 24 | S.P. Lee<br>1984       | -74.02 | 170.20  | 557  | 290 | 1920 |
| 26 | S.P. Lee<br>1984       | -74.31 | 169.09  | 695  | 190 | 1930 |
| 27 | S.P. Lee<br>1984       | -74.69 | 167.45  | 825  | 420 | 2210 |
| 28 | S.P. Lee<br>1984       | -75.20 | 166.20  | 873  | 110 | 1790 |
| 29 | S.P. Lee<br>1984       | -75.99 | 164.93  | 918  | 460 | 1720 |
| 30 | S.P. Lee<br>1984       | -76.43 | 164.92  | 808  | 150 | 1790 |
| 31 | S.P. Lee<br>1984       | -76.93 | 165.00  | 565  | 140 | 1780 |
| 32 | S.P. Lee<br>1984       | -72.55 | -178.31 | 554  | 160 | 1920 |
| 33 | S.P. Lee<br>1984       | -72.53 | -175.95 | 818  | 270 | 1970 |
| 34 | S.P. Lee<br>1984       | -72.52 | -173.60 | 3344 | 490 | 1790 |
| 35 | S.P. Lee<br>1984       | -72.13 | -177.29 | 700  | 180 | 1920 |
| 37 | S.P. Lee<br>1984       | -72.10 | 179.30  | 2218 | 690 | 1800 |
| 38 | S.P. Lee<br>1984       | -71.38 | 174.90  | 2330 | 550 | 1700 |
| 39 | S.P. Lee<br>1984       | -70.72 | 175.28  | 2416 | 310 | 1700 |
| 44 | Polar<br>Queen<br>1988 | -76.00 | 177.22  | 466  | 90  | 1900 |
| 45 | Polar<br>Queen<br>1988 | -76.00 | 175.48  | 569  | 420 | 1900 |
| 46 | Polar<br>Queen<br>1988 | -76.00 | 173.90  | 533  | 360 | 1900 |
| 47 | Polar<br>Queen<br>1988 | -76.00 | 172.25  | 600  | 320 | 1900 |
| 48 | Polar<br>Queen<br>1988 | -76.00 | 170.59  | 690  | 140 | 1930 |
| 50 | Polar<br>Queen<br>1988 | -75.60 | 173.34  | 503  | 290 | 1900 |
| 51 | Polar<br>Queen<br>1988 | -76.12 | 173.33  | 630  | 290 | 1900 |

|    |                     |        |         |      |     |      |
|----|---------------------|--------|---------|------|-----|------|
| 52 | Polar Queen<br>1988 | -76.42 | 173.34  | 578  | 430 | 1900 |
| 53 | Polar Queen<br>1988 | -75.41 | 165.20  | 451  | 780 | 2360 |
| 54 | Polar Queen<br>1988 | -75.01 | 165.50  | 1103 | 210 | 1900 |
| 55 | Polar Queen<br>1988 | -75.39 | 176.51  | 361  | 590 | 1900 |
| 56 | Polar Queen<br>1988 | -75.29 | 174.92  | 293  | 400 | 1900 |
| 57 | Polar Queen<br>1988 | -75.22 | 173.43  | 480  | 350 | 1900 |
| 59 | Polar Queen<br>1988 | -75.01 | 171.40  | 577  | 80  | 1900 |
| 60 | Polar Queen<br>1988 | -75.18 | -175.25 | 317  | 820 | 1800 |
| 61 | Polar Queen<br>1988 | -74.76 | -175.26 | 279  | 920 | 1800 |
| 62 | Polar Queen<br>1988 | -74.31 | -175.24 | 433  | 640 | 1800 |
| 63 | Polar Queen<br>1988 | -73.75 | -175.24 | 395  | 660 | 1800 |
| 61 | Polar Queen<br>1988 | -74.63 | 168.24  | 580  | 440 | 1930 |
| 62 | Polar Queen<br>1988 | -73.97 | 171.51  | 493  | 350 | 1900 |
| 63 | Polar Queen<br>1988 | -74.52 | 171.50  | 428  | 210 | 1900 |
| 64 | OGS Explora<br>1989 | -75.47 | 174.00  | 297  | 410 | 1900 |
| 65 | OGS Explora<br>1989 | -75.28 | 172.21  | 522  | 120 | 1900 |

|    |                        |        |         |      |     |      |
|----|------------------------|--------|---------|------|-----|------|
| 66 | OGS<br>Explora<br>1989 | -75.29 | 170.01  | 370  | 260 | 1900 |
| 67 | OGS<br>Explora<br>1989 | -75.47 | 173.33  | 442  | 420 | 1900 |
| 68 | OGS<br>Explora<br>1989 | -75.38 | 175.25  | 319  | 470 | 1900 |
| 69 | OGS<br>Explora<br>1989 | -73.53 | 178.60  | 334  | 200 | 1900 |
| 70 | OGS<br>Explora<br>1989 | -73.58 | -177.39 | 1014 | 620 | 1870 |
| 71 | OGS<br>Explora<br>1989 | -74.38 | -178.97 | 303  | 800 | 2010 |
| 72 | OGS<br>Explora<br>1989 | -76.37 | -176.09 | 580  | 340 | 1930 |
| 74 | OGS<br>Explora<br>1989 | -77.45 | -174.00 | 544  | 240 | 1900 |
| 75 | OGS<br>Explora<br>1989 | -77.45 | -178.50 | 525  | 60  | 2220 |
| 76 | OGS<br>Explora<br>1989 | -77.45 | -178.51 | 660  | 290 | 1830 |
| 77 | OGS<br>Explora<br>1989 | -77.12 | -178.69 | 638  | 210 | 1900 |
| 78 | OGS<br>Explora<br>1989 | -76.33 | -179.76 | 371  | 130 | 1900 |
| 79 | OGS<br>Explora<br>1989 | -76.29 | 177.00  | 443  | 470 | 1900 |
| 80 | OGS<br>Explora<br>1989 | -75.44 | 177.00  | 404  | 450 | 1900 |
| 81 | OGS<br>Explora<br>1989 | -73.72 | 176.98  | 372  | 10  | 2150 |
| 87 | OGS<br>Explora<br>1990 | -74.88 | 165.48  | 782  | 470 | 1800 |

|     |                        |        |        |     |     |      |
|-----|------------------------|--------|--------|-----|-----|------|
| 88  | OGS<br>Explora<br>1990 | -74.97 | 164.71 | 920 | 270 | 1800 |
| 89  | OGS<br>Explora<br>1990 | -75.07 | 168.11 | 316 | 410 | 1800 |
| 90  | OGS<br>Explora<br>1990 | -75.04 | 164.92 | 929 | 280 | 1800 |
| 91  | OGS<br>Explora<br>1990 | -75.37 | 166.65 | 476 | 410 | 1800 |
| 92  | OGS<br>Explora<br>1990 | -75.91 | 166.35 | 507 | 410 | 1800 |
| 93  | OGS<br>Explora<br>1990 | -76.05 | 164.92 | 883 | 980 | 1800 |
| 94  | OGS<br>Explora<br>1990 | -75.93 | 163.79 | 730 | 390 | 1800 |
| 95  | OGS<br>Explora<br>1990 | -75.84 | 164.67 | 773 | 880 | 1800 |
| 96  | OGS<br>Explora<br>1990 | -75.92 | 163.72 | 697 | 410 | 1800 |
| 97  | OGS<br>Explora<br>1990 | -75.94 | 163.96 | 714 | 340 | 1800 |
| 98  | OGS<br>Explora<br>1990 | -75.92 | 164.21 | 681 | 430 | 1800 |
| 99  | OGS<br>Explora<br>1990 | -76.99 | 164.78 | 440 | 740 | 1800 |
| 100 | OGS<br>Explora<br>1990 | -77.02 | 166.01 | 833 | 950 | 1800 |
| 101 | OGS<br>Explora<br>1990 | -77.14 | 166.30 | 936 | 360 | 1800 |
| 102 | OGS<br>Explora<br>1990 | -77.59 | 164.56 | 263 | 290 | 1800 |
| 103 | OGS<br>Explora<br>1990 | -76.95 | 164.41 | 387 | 310 | 1800 |

|     |                        |        |        |      |     |      |
|-----|------------------------|--------|--------|------|-----|------|
| 104 | OGS<br>Explora<br>1990 | -77.08 | 166.34 | 933  | 630 | 1800 |
| 105 | OGS<br>Explora<br>1990 | -76.88 | 164.96 | 574  | 560 | 1800 |
| 106 | OGS<br>Explora<br>1990 | -76.53 | 166.26 | 630  | 410 | 1800 |
| 107 | OGS<br>Explora<br>1990 | -70.29 | 166.28 | 604  | 360 | 1800 |
| 108 | OGS<br>Explora<br>1990 | -75.03 | 167.75 | 419  | 370 | 1800 |
| 109 | OGS<br>Explora<br>1990 | -74.85 | 166.19 | 1080 | 440 | 1800 |
| 110 | OGS<br>Explora<br>1990 | -75.06 | 169.24 | 370  | 340 | 1800 |
| 111 | OGS<br>Explora<br>1990 | -74.80 | 170.42 | 300  | 490 | 1800 |
| 112 | OGS<br>Explora<br>1990 | -74.56 | 169.15 | 537  | 290 | 1800 |
| 113 | OGS<br>Explora<br>1990 | -63.01 | 166.85 | 2357 | 610 | 1800 |

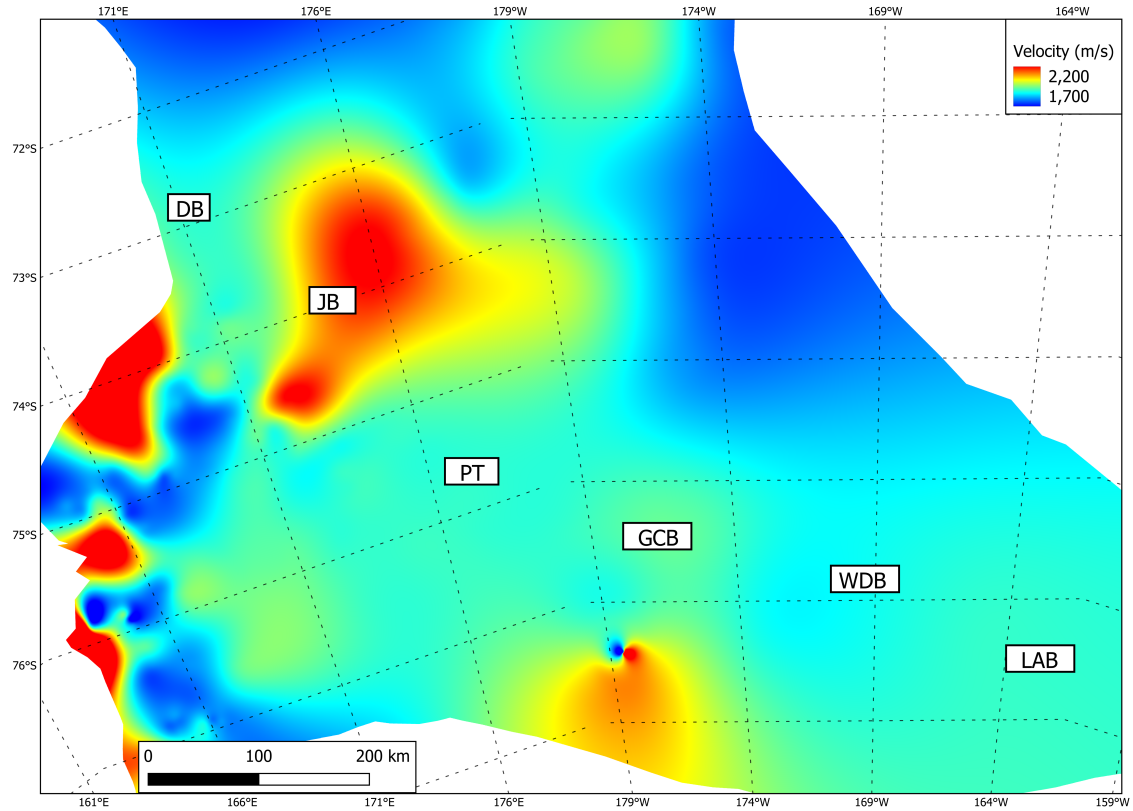

**Figure S1.** Interval velocity map of the Ross Sea created from interpolation of the refraction sonobuoy data reported in Cochrane et al., (1992). Interval velocities varied laterally from 1700 m/s to 2200 m/s within this layer of sediment. This interval velocity map was used as the input to a velocity model constructed in Petrel that was subsequently used for depth conversion of time-thickness maps.

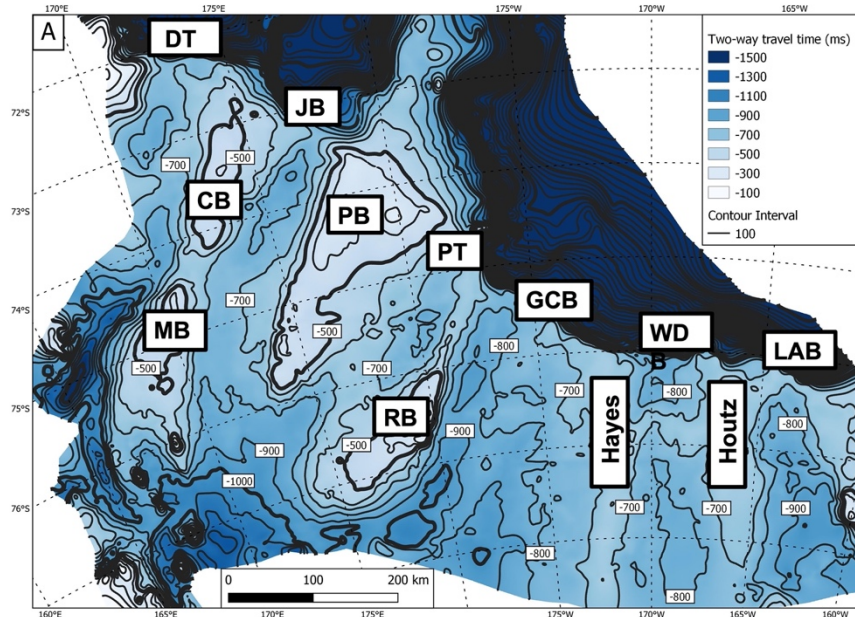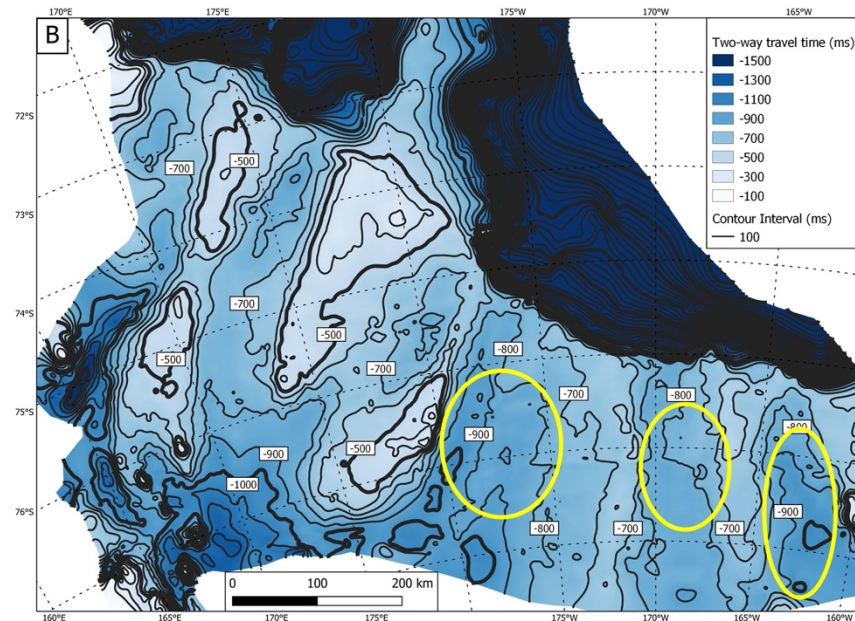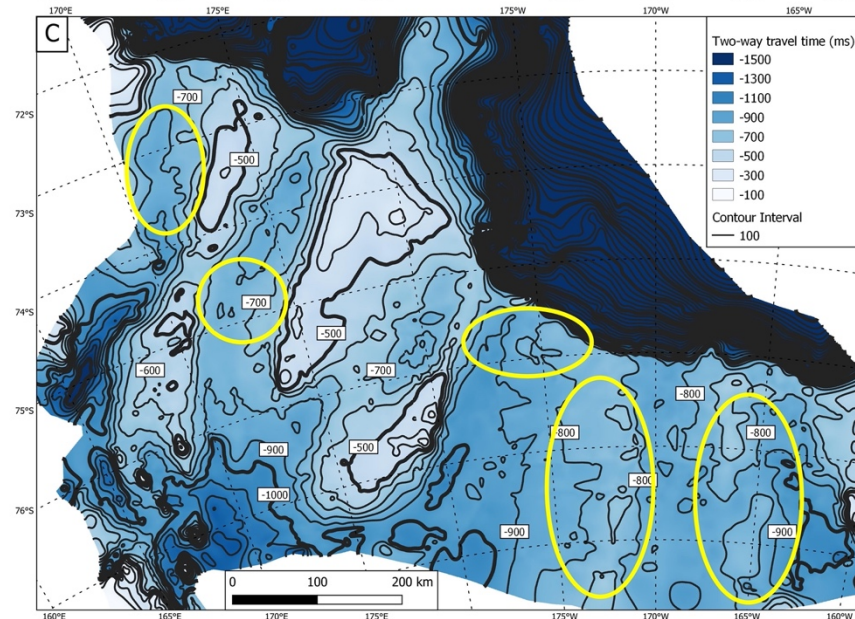

**Figure S2: Two-way travel time contour maps of seafloor reflector (A), post-LGM unconformity (B) and the LGM unconformity (C) based on convergent interpolation of interpretations using the seismic lines shown in Figure 1. The post-LGM unconformity underlies the post-LGM age GZW complexes and is equal to the seafloor reflection in locations such as the outer shelf of DT, middle shelf of JB and middle shelf of PT. The LGM unconformity underlies the LGM age GZW complexes and is equal to the seafloor reflection for all the western Ross Sea banks.**

**A: Present-day bathymetry of the Ross Sea shelf.**

**B: Map of the unconformity left at the end of the LGM. Notice the absence of the middle shelf benches in the eastern Ross Sea troughs of GCB, WDB and LAB indicating deposition of large middle shelf GZWs during the post-LGM.**

**C: Map of the unconformity before the LGM deposition. Notice the absence of the large GZW deposits in the western Ross Sea troughs of DT and JB indicating deposition during the LGM. There is no change in the banks of the western Ross Sea during the LGM or later, but deposition during the LGM formed the shallowest sections of the Hayes and Houtz banks in eastern Ross Sea.**

**Contour interval = 100 ms. Labels of geometric features on the Ross Sea shelf follow: LAB = Little America Basin, WDB = Whales Deep Basin, GCB = Glomar Challenger Basin, PT = Pennell Trough, CT = Central Trough, JB = JOIDES Basin, DT = Drygalski Trough, Houtz = Houtz Bank, Hayes = Hayes Bank, RB = Ross Bank, PB = Pennell Bank, MB = Mawson Bank, CB = Crary Bank.**
